# Supplementary material for: Avoidance and Potential Remedy Solutions of Chimeras in Reconstructing the Phylogeny of Aphids Using the 16S rRNA Gene of Buchnera: A Case in Lachninae (Hemiptera)
Source: MDPI journal article supplement (doi:10.3390/ijms160920152), 2015-08-25
Supplement: s1 [file s1]

# Supplementary Information

|      |                                                                        |      |
|------|------------------------------------------------------------------------|------|
| 1    | AGAGTTTGATCATGGCTCAGATTGAACGCTGGCGGCAGGCCTAACACATGCAAGTCGAACGGAGTTATAT | 70   |
|      | AGAGTTTGATCTGGCTCAGAAATGAACGCTGGCGGCAGGCCTAACACATGCAAGTCGAACGGAGTTATAT |      |
| 71   | TGTAGCTTGCTATGGTATAACTTAGTGGCAGACGGGTGGTAAATGTATAGGAATCTACCTAATAGTGCGG | 140  |
|      | TGTAGCTTGCTATGGTATAACTTAGTGGCAGACGGGTGAGTAATGTATAGGAATCTACCTAGTAGTACGG |      |
| 141  | AATAATTGTTGAAACGGCAACTAATACCGTATACGCCCTACGGGGGAAAAATTTATTGCTATTAGATGA  | 210  |
|      | AATAATTGTTGAAACGGCAACTAATACCGTATACGCCCTACGGGGGAAAAATTTATTGCTATTAGATGA  |      |
| 211  | GCCTATATTAGATTAGCTAGTTGGTGGAGTAATAGCCTACCAAGGCAATGATCTATAGCTGATCTGAGAG | 280  |
|      | GCCTATATTAGATTAGCTAGTTGGTGGAGTAATAGCCTACCAAGGCAATGATCTATAGCTGATCTGAGAG |      |
| 281  | GATGATCAGCCCACTGGAAGTGAAGTACGGTCCAGACTCCTACGGGAGGCAGCAGTGGGGAATATTGGA  | 350  |
|      | GATGATCAGCCCACTGGAAGTGAAGTACGGTCCAGACTCCTACGGGAGGCAGCAGTGGGGAATATTGGA  |      |
| 351  | CAATGGGCGAAAGCCTGATCCAGCCATGCCGCATGAGTGAAGAAGGCCCTTGGGTTGTAAAGCTCTTTTA | 420  |
|      | CAATGGGCGAAAGCCTGATCCAGCCATGCCGCATGAGTGAAGAAGGCCCTTGGGTTGTAAAGCTCTTTTA |      |
| 421  | GTGAGGAAGATAATGACGGTACTCAGAGAAGAAGTCTGGCTAACTCCGTGCCAGCAGCCGCGTAATAC   | 490  |
|      | GTGAGGAAGATAATGACGGTACTCAGAGAAGAAGTCTGGCTAACTCCGTGCCAGCAGCCGCGTAATAC   |      |
| 491  | GGAGAGGGCTAGCGTTATTCGGAATTATTGGCGTAAAGGGCGCGTAGGCGGATTAGTAAGTTAAAAGTG  | 560  |
|      | GGAGAGGGCTAGCGTTATTCGGAATTATTGGCGTAAAGGGCGCGTAGGCGGATTAGTAAGTTAAAAGTG  |      |
| 561  | AAATCCCAAGGCTCAACCTTGAATTGCTTTTAAACTGCTAATCTAGAGATTGAAAGAGGATAGAGGAA   | 630  |
|      | AAATCCCAAGGCTCAACCTTGAATTGCTTTTAAACTGCTAATCTAGAGATTGAAAGAGGATAGAGGAA   |      |
| 631  | TTCCTAGTGTAGAGGTGAAATTCGTAATATTAGGAGGAACACCAAGTGGCGAAGGCGTCTATCTGGTTCA | 700  |
|      | TTCCTAGTGTAGAGGTGAAATTCGTAATATTAGGAGGAACACCAAGTGGCGAAGGCGTCTATCTGGTTCA |      |
| 701  | AATCTGACGCTGAGGCGCGAAGGCGTGGGAGCAAACAGGATTAGATACCCTGGTAGTCCACGCTGTAAA  | 770  |
|      | AATCTGACGCTGAGGCGCGAAGGCGTGGGAGCAAACAGGATTAGATACCCTGGTAGTCCACGCTGTAAA  |      |
| 771  | CGATGAATGTTAAATATGGGAAGTTTACTTTCTGTATTACAGTAACGCGTTAAACATTCCGCTGGGG    | 840  |
|      | CGATGAATGTTAAATATGGGAAGTTTACTTTCTGTATTACAGTAACGCGTTAAACATTCCGCTGGGG    |      |
| 841  | ACTACGGTCGCAAGATTAATACTCAAAGGAATTGACGGGGACCCGCACAAGCGGTGGAGCATGTGGTTTA | 910  |
|      | ACTACGGTCGCAAGATTAATACTCAAAGGAATTGACGGGGACCCGCACAAGCGGTGGAGCATGTGGTTTA |      |
| 911  | ATTCGACGCAACGCGAAGAACCTTACCTGGTCTTGACATCCATAGAATTTTATAGAAATATAGAAGTGCC | 980  |
|      | ATTCGATGCAACGCGAAGAACCTTACCTGGTCTTGACATCCATAGAATTTTATAGAAATATAGAAGTGCC |      |
| 971  | ATTCGATGCAACGCGAAGAACCTTACCTGGTCTTGACATCCATAGAATTTTATAGAAATATAGAAGTGCC | 1040 |
|      | ATTCGATGCAACGCGAAGAACCTTACCTGGTCTTGACATCCATAGAATTTTATAGAAATATAGAAGTGCC |      |
| 981  | TTCGGGAAGTATGAGACAGGTGCTGCATGGCTGTCGTCAGCTCGTGTGTGAAATGTTGGGTTAAGTCCC  | 1050 |
| 1041 | TTCGGGAAGTATGAGACAGGTGCTGCATGGCTGTCGTCAGCTCGTGTGTGAAATGTTGGGTTAAGTCCC  | 1110 |
|      | TTCGGGAAGTATGAGACAGGTGCTGCATGGCTGTCGTCAGCTCGTGTGTGAAATGTTGGGTTAAGTCCC  |      |
| 1051 | GCAACGAGCGCAACCCCTATCCTTTGTTGCCATCGGTTGGCCGGGAACTCAGGGGAGACTGCCGGTTAT  | 1120 |
| 1111 | GCAACGAGCGCAACCCCTATCCTTTGTTGCCATCGGTTGGCCGGGAACTCAGGGGAGACTGCCGGTTAT  | 1180 |
|      | GCAACGAGCGCAACCCCTATCCTTTGTTGCCATCGGTTGGCCGGGAACTCAGGGGAGACTGCCGGTTAT  |      |
| 1121 | AAACCGGAGGAAGGTGGGGACGACGTCAAGTCATCATGGCCCTTACGACCAGGGCTACACACGTGCTACA | 1190 |
| 1181 | AAACCGGAGGAAGGTGGGGACGACGTCAAGTCATCATGGCCCTTACGACCAGGGCTACACACGTGCTACA | 1250 |
|      | AAACCGGAGGAAGGTGGGGACGACGTCAAGTCATCATGGCCCTTACGACCAGGGCTACACACGTGCTACA |      |
| 1191 | ATGGTATATACAAAGAGAAGCGACTCCGTAAAGATAAGCAAACCTCATAAAGTATATCGTAGTCCGGACT | 1260 |
| 1251 | ATGGTATATACAAAGAGAAGCGACTCCGTAAAGATAAGCAAACCTCATAAAGTATATCGTAGTCCGGACT | 1320 |
|      | ATGGTATATACAAAGAGAAGCGACTCCGTAAAGATAAGCAAACCTCATAAAGTATATCGTAGTCCGGACT |      |
| 1261 | GGAGTCTGCAACTCGACTCCACGAAGTCGGAATCGCTAGTAATCGTGGATCAGAATGCCACGGTGAATAC | 1330 |
| 1321 | GGAGTCTGCAACTCGACTCCACGAAGTCGGAATCGCTAGTAATCGTGGATCAGAATGCCACGGTGAATAC | 1390 |
|      | GGAGTCTGCAACTCGACTCCACGAAGTCGGAATCGCTAGTAATCGTGGATCAGAATGCCACGGTGAATAC |      |
| 1331 | GTTCCCGGGCCTTGACACGCCGCCGTCACACCATGGGAGTGGGTTGCAAAAGAAGCAGATATCTTAAC   | 1400 |
| 1391 | GTTCCCGGGCCTTGACACGCCGCCGTCACACCATGGGAGTGGGTTGCAAAAGAAGCAGATATCTTAAC   | 1460 |
|      | GTTCCCGGGCCTTGACACGCCGCCGTCACACCATGGGAGTGGGTTGCAAAAGAAGCAGATATCTTAAC   |      |
| 1401 | TGTTTTAAACA--GAGGGAATCTATCACTTTGTGATTCATGACTGGGGTGAAGTCGTAACAAGGT      | 1463 |
| 1461 | CGTTTTAAAAACGGAGGGAATCTATCACTTTGTGATTCATGACTGGGGTGAAGTCGTAACAAGGT      | 1525 |
|      | CGTTTTAAAAACGGAGGGAATCTATCACTTTGTGATTCATGACTGGGGTGAAGTCGTAACAAGGT      |      |

**Figure S1.** The composition of the chimeric sequence from the aphid *Stomaphis sinisalicis*.

Black represents the chimeric sequence, green represents the *Wolbachia* sequence, and blue represents the *Buchnera* sequences. The red bar indicates different bases in alignment. In the region of the pink square frame, the sequences of *Wolbachia* and *Buchnera* are the same.

BLAST® Basic Local Alignment Search Tool

Home Recent Results Saved Strategies Help

My NCBI [Sign In] [Register]

NCBI/BLAST/blastn suite/Formatting Results - 4AF90Z5W014

Edit and Resubmit Save Search Strategies Formatting options Download

YouTube How to read this page Blast report description

**Nucleotide Sequence (1504 letters)**

RID: 4AF90Z5W014 (Expires on 09-28 16:09 pm)

Query ID: Id111635

Description: None

Molecule type: nucleic acid

Query Length: 1504

Database Name: nr

Description: Nucleotide collection (nr)

Program: BLASTN 2.2.28+ Citation

Other reports: Search Summary [Taxonomy reports] [Distance tree of results]

**Descriptions**

Sequences producing significant alignments:

Select: All None Selected: 0

Alignments Download GenBank Graphics Distance tree of results

| Description                                                                                                   | Max score | Total score | Query cover | E value | Ident | Accession                  |
|---------------------------------------------------------------------------------------------------------------|-----------|-------------|-------------|---------|-------|----------------------------|
| <input type="checkbox"/> Buchnera aphidicola (Lachnus roboris) partial 16S rRNA gene                          | 2287      | 2287        | 100%        | 0.0     | 94%   | <a href="#">AJ296756.1</a> |
| <input type="checkbox"/> Buchnera aphidicola (Tuberolachnus salignus) partial 16S rRNA gene                   | 2270      | 2270        | 100%        | 0.0     | 94%   | <a href="#">AJ296754.1</a> |
| <input type="checkbox"/> Buchnera aphidicola (Lachnus roboris) 16S ribosomal RNA gene, partial sequence       | 2261      | 2261        | 99%         | 0.0     | 94%   | <a href="#">FJ655507.1</a> |
| <input type="checkbox"/> Buchnera aphidicola (Nippolachnus pini) 16S ribosomal RNA gene, partial sequence     | 2222      | 2222        | 99%         | 0.0     | 93%   | <a href="#">FJ655512.1</a> |
| <input type="checkbox"/> Buchnera aphidicola (Pterochloroides sp.) 16S ribosomal RNA gene, partial sequence   | 2218      | 2218        | 99%         | 0.0     | 93%   | <a href="#">FJ655511.1</a> |
| <input type="checkbox"/> Buchnera aphidicola (Nippolachnus pini) 16S ribosomal RNA gene, partial sequence     | 2209      | 2209        | 99%         | 0.0     | 93%   | <a href="#">FJ655513.1</a> |
| <input type="checkbox"/> Buchnera aphidicola (Stomaphis fagi) 16S ribosomal RNA gene, partial sequence        | 2207      | 2207        | 99%         | 0.0     | 93%   | <a href="#">FJ655501.1</a> |
| <input type="checkbox"/> Buchnera aphidicola (Stomaphis takahashii) 16S ribosomal RNA gene, partial sequence  | 2200      | 2200        | 99%         | 0.0     | 93%   | <a href="#">FJ655500.1</a> |
| <input type="checkbox"/> Buchnera aphidicola (Stomaphis sp.) 16S ribosomal RNA gene, partial sequence         | 2193      | 2193        | 99%         | 0.0     | 93%   | <a href="#">FJ655498.1</a> |
| <input type="checkbox"/> Buchnera aphidicola (Stomaphis yanonis) 16S ribosomal RNA gene, partial sequence     | 2189      | 2189        | 99%         | 0.0     | 93%   | <a href="#">FJ655497.1</a> |
| <input type="checkbox"/> Buchnera aphidicola (Stomaphis sp.) 16S ribosomal RNA gene, partial sequence         | 2178      | 2178        | 99%         | 0.0     | 93%   | <a href="#">FJ655499.1</a> |
| <input type="checkbox"/> Buchnera aphidicola (Maculolachnus submacula) partial 16S rRNA gene                  | 2178      | 2178        | 100%        | 0.0     | 93%   | <a href="#">AJ296755.1</a> |
| <input type="checkbox"/> Buchnera aphidicola (Stomaphis quercus) 16S ribosomal RNA gene, partial sequence     | 2169      | 2169        | 99%         | 0.0     | 93%   | <a href="#">FJ655505.1</a> |
| <input type="checkbox"/> Buchnera aphidicola (Stomaphis aphananthae) 16S ribosomal RNA gene, partial sequence | 2154      | 2154        | 99%         | 0.0     | 92%   | <a href="#">FJ655495.1</a> |
| <input type="checkbox"/> Buchnera aphidicola (Stomaphis quercus) partial 16S rRNA gene                        | 2154      | 2154        | 100%        | 0.0     | 92%   | <a href="#">AJ296753.1</a> |
| <input type="checkbox"/> Buchnera aphidicola (Stomaphis pini) 16S ribosomal RNA gene, partial sequence        | 2145      | 2145        | 99%         | 0.0     | 92%   | <a href="#">FJ655503.1</a> |
| <input type="checkbox"/> Buchnera aphidicola (Cinara tujafilina), complete genome                             | 2141      | 2141        | 100%        | 0.0     | 92%   | <a href="#">CP001817.1</a> |

**Figure S2.** The webpage interface that indicates the results of the BLAST search of the chimeric sequence from *Lachnus quercihabitanis*.

**Table S1.** The detailed host information and GenBank accession numbers of *Buchnera* download from GenBank.

| Subfamily       | Species                           | GB. Number |
|-----------------|-----------------------------------|------------|
| Aphidinae       | <i>Aphis nerii</i>                | JQ269567   |
|                 | <i>Aphis nasturtii</i>            | JQ269568   |
|                 | <i>Aphis craccivora</i>           | JQ269569   |
|                 | <i>Rhopalosiphum maidis</i>       | M63247     |
|                 | <i>Schizaphis graminum</i>        | NR074512   |
|                 | <i>Acyrtosiphon pisum</i>         | NR074159   |
|                 | <i>Aspidophorodon longicaudus</i> | JQ269566   |
|                 | <i>Capitophorus hudsonicus</i>    | JQ269564   |
|                 | <i>Diuraphis noxia</i>            | M63251     |
|                 | <i>Macrosiphoniella sanborn</i>   | JQ269571   |
|                 | <i>Myzus persicae</i>             | AY849937   |
|                 | <i>Sitobion miscanthi</i>         | HM156635   |
|                 | <i>Uroleucon sonchi</i>           | M63250     |
|                 | <i>Chaitophorus viminalis</i>     | M63252     |
| Chaitophorinae  | <i>Sipha elegans</i>              | JQ269587   |
| Drepanosiphinae | <i>Yamatocallis tokyoensis</i>    | AB064514   |

**Table S1. Cont.**

| Subfamily       | Species                                 | GB. Number |
|-----------------|-----------------------------------------|------------|
|                 | <i>Eutrichosiphum sinense</i>           | JQ269580   |
| Greenideinae    | <i>Mollitrachosiphum nigrofasciatum</i> | JQ269579   |
|                 | <i>Greenideinae</i> sp.                 | JQ269578   |
| Hormaphidinae   | <i>Hamamelistes spinosus</i>            | JQ269574   |
|                 | <i>Cinara edulis</i>                    | FJ655493   |
|                 | <i>Cinara gudarisi</i>                  | EU334771   |
|                 | <i>Cinara maghrebica</i>                | EU334772   |
|                 | <i>Cinara pinea</i>                     | FJ655490   |
|                 | <i>Cinara tujaefilina</i>               | EU334773   |
|                 | <i>Cinara wahtolca</i>                  | FJ655492   |
| Lachninae       | <i>Lachnus roboris</i>                  | FJ655507   |
|                 | <i>Nippolachnus piri</i>                | FJ655513   |
|                 | <i>Pterochloroides</i> sp.              | FJ655511   |
|                 | <i>Stomaphis aphananthae</i>            | FJ655495   |
|                 | <i>Stomaphis fagi</i>                   | FJ655501   |
|                 | <i>Stomaphis quercus</i>                | FJ655505   |
|                 | <i>Tuberolachnus salignus</i>           | AJ296754   |
|                 | <i>Myzocallis agrifolicola</i>          | JQ269546   |
| Myzocallidinae  | <i>Hoplocallis pictus</i>               | AJ296759   |
|                 | <i>Panaphis juglandis</i>               | AJ296758   |
| Mindarinae      | <i>Mindarus victoria</i>                | M63253     |
|                 | <i>Baizongia pistaciae</i>              | NR074609   |
|                 | <i>Eriosoma lanigerum</i>               | DQ418492   |
| Pemphiginae     | <i>Melaphis rhois</i>                   | JQ269582   |
|                 | <i>Pemphigus populi</i>                 | AJ296750   |
|                 | <i>Prociphilus caryae</i>               | JQ269572   |
|                 | <i>Tetraneura caerulescens</i>          | AJ296749   |
| Pterocommatinae | <i>Pterocomma populeum</i>              | AJ296747   |
| Thelaxinae      | <i>Thelaxes suberi</i>                  | AJ296757   |

**Table S2.** The detailed information and GenBank accession numbers of *Serratia* download from GenBank as outgroups.

| Subfamily | Species                     | GB. Number |
|-----------|-----------------------------|------------|
| Aphidinae | <i>Aphis fabae</i>          | GU394001   |
|           | <i>Cinara cedri</i>         | CP002295   |
| Lachninae | <i>Cinara cedri</i>         | EU348324   |
|           | <i>Cinara schimitscheki</i> | EU348318   |
