# Supplementary material for: Avoidance and Potential Remedy Solutions of Chimeras in Reconstructing the Phylogeny of Aphids Using the 16S rRNA Gene of Buchnera: A Case in Lachninae (Hemiptera)
Source: MDPI journal article supplement (doi:10.3390/ijms160920152), 2015-08-25
Supplement: s1 [file s1]

>The chimeric sequence from aphid species *Maculolachnus submacula*

AGAGTTTGCATCATGGCTCAGATTGAACGCTGGCGGCAGGCTTAACACATGCAAGTCGAAC  
GGTAACAGAGAAAAGGCTTGCCTTTTCTGCTGACGAGTGGCGGACGGGTGAGTAAAGTAT  
GGGGATCTGCCGAATGGAGGGGGACAACCTGCTGGAAACGGCAGCTAATACCGCATAAAGT  
TGAGAGACCAAAGCGTGGGACTTTTTAGCCACGCGCCATTTGATGAACCCATATGGGATTA  
GCTGGTTGGTAGGGTAATGGCTTACCAAGGCGACGATCTCTAGCTGGTCTGAGAGGATGAC  
CAGCCACACTGGAACCTGAGACACGGTCCAGACTCCTATGGGAGGCAGCAGTGGGGGATAT  
TGCACAATGGGGGAAACCCTGATGCAGCCATGCCGCGTGTATGAAGAAGGCTTTCGGGT  
GTAAAGTACTTTCGGTAATGAGGAAGGTGTATTATCTAACAGGTAATGCAATTGACGTTAGT  
TACAGAAGAAGCACCGGCTAACTCCGTGCCAGCAGCCGCGGTAATACGGAGGGTGCGAGC  
GTTAATCAGAATTACTGGGCGTAAAGAGCTCGTAGGTGGATTATAAGTCAGATGTGAAATC  
CCTGGGCTTAACCTAGGAACCTGCATTTGAAACTGTAATTCTAGAGTTTCGTAGAGGGAGGT  
AGAATTCTAGGTGTAGCGGTGAAATGCGTAGATATCTGGAGGAATACCTGTGGCGAAAGCG  
GCCTCCTGGACGAAAACCTGACACTGAGGTGCGAAAGCGTGGGGATCAAACAGGATTAGAT  
ACCCTGGTAGTCCACGCTGTAAACGATGTCGACTTGGAGGTTGTTCCCTTAGAGGAGTGTC  
TTCCGAAGCTAACGCGTTAAGTCGACCGCCTGGGGAGTACGGCCGCAAGGCTAAAACTCA  
AATGAATTGACGGGGGCCCCGCACAAGCGGTGGAGCATGTGGTTTAATTCGATGCAACGCG  
AAAAACCTTACCTGGTCTTGACATCCATAGAATTTTATAGAAAATATAGAAGTGCCTTCGGG  
AACTATGAGACAGGTGCTGCATGGCTGTCGTCAGCTCATGTTGTGAAATGTTGGGTAAAGT  
CCCGCAACGAGCGCAACCCTTTTCCTTTGTTGCCATCAGGTAAAGCTGGGAACTCAGAGGA  
TACTGCCGGTTATAAACCGGAGGAAGGTGGGGACGACGTCAAGTCATCATGGCCCTTACGA  
CCAGGGCTACACACGTGCTACAATGGTGCATACAAAGAGAAGCAACTCTGCAAAGATAAG  
CAAACCTCATAAAGTGCATCGAAGTCCGGACTGGAGTCTGCAACTCGACTCCACGAAGTC  
GGAATCGCTAGTAATCGTGGATCAGAATGCCACGGTGAATACGTTCCCGGGCCTTGTACAC  
ACCGCCCGTCACACCATGGGAGTGAGTTGCAAAAGAAGCAGGTGTTCTAACCAAATTTATT  
TGGAAGTAACCTACCCTTTGTGGTTCATGACTGGGGTGAAGTCGTAACAAGGTA

>The chimeric sequence from aphid species *Cinara piniphila*

AGAGTTTGCATCATGGCTCAGATTGAACGCTGGCGGCAAGCCTAACACATGCAAGTCGTGCG  
GCATCGAGAAAATATTTATATTTTTGTGCGCGAGCGGCGAACGGGTGAGTAATATCTGGGGA  
TCTACCTAAGAGAGAGGGACAACCTACTGGAAACGGTGGCTAATACCGCATAATGTTGAAAA  
ACCAAAGTAGGGGATCTTGTGTGTTATAAAAGACCTTGCGCTTTTAGATGAACCCAGACGAG  
ATTAGCTTGATGGTAAGGTAATGGCTTACCATGGCTACGATCTCTAGCTGGTCTGAGAGGAT  
GGCCAGCCACACTGGAACCTGAGACACGGTCCAGACTCCTACGGGAGGCAGCAGTGGGGA  
ATATTGCACAATGGGCGCAAGCCTGATGCAGCTATGCCGCGTGTATGAAGAAGGCCTTAGG  
GTTGTAAAGTACTTTCGTCAGGAAAGAAGGTGATAAAGCTAATATCTTTATTAATTGACGTT  
ACCTGAAAAAGAAGCACCGGCTAACTCCGTGCCAGCAGCCGCGGTAATACGGAGGGTGCG  
AGCGTTAATCAGAATTACTGGGCGTAAAGAGCGCGTAGGCGGTTATTTAAGTCAGATGTGA  
AAGCCCTGGGCTTAACCTAGGAACCTGCATTTGAAACTGAATAACTAGAGTTTCGTAGAGGG  
AGGTAGAATTCTAGGTGTAGCGGTGAAATGCGTAGATATCTGGAGGAATACCTGTGGCGAA  
AGCGACCTCCTGGACGAAAACCTGACGCTGAGGTGCGAAAGCGTGGGGAGCAAACAGGAT  
TAGATACCCTGGTAGTCCATGCTGTAAACGATGTCGACTTGGAGGTTGTTTCCATAGAGAGA  
TGGCTTCCGAAGCTAACGCATTAAGTCGACCGCCTGGGGAGTACGGCCGCAAGGTTAAAA

CTCAAATGAATTGACGGGGGCCCCGCACAAGCGGTGGAGCATGTGGTTTAATTCGATGCAAC  
GCGAAGAACCTTACCTACTCTTGACATCCAGAGTACTATCCAGAGATGGATAGGTGCCTTAC  
GGAGCTCTGAGACAGGTGCTGCATGGCTGTCGTCAGCTCGTGTTGTGAAATGTTGGGTAA  
GTCCCGCAACGAGCGCAACCCTTATCCTTTGTTGCCAGCGATTAGGCCGGGAACCTCAAAGG  
AGACTGCCGGTGACAAACCGGAGGAAGGTGGGGATGACGTCAAGTCATCATGGCCCTTAC  
GAGTAGGGCTACACACGTGCTACAATGGTGTATACAAAGAGAAGCAACCTCGCGAGAGTA  
AGCGGATCTCACAAAGTACATCATAGTCCGGATTGGAGTCTGCAACTCGACTCCATGAAGT  
CGGAATCGCTAGTAATCGTAGATCAGAATGCTACGGTGAATATGTTCCCTGGGCCTTGTACAC  
ACCGCCCGTACACCATGGGAGTGAGTTGCAAAAGAAGTAGGTAGCTTAACCTAAGGGAG  
GGCGCTTACCACTTTGTGGTTCATAACTGGGGTGAAGTCGTAACAAGGTA

>The chimeric sequence from aphid species *Cinara bungeanae*

AGAGTTTGATCATGGCTCAGATTGAACGCTGGCGGCAAGCCTAACACATGCAAGTCGTGCG  
GCAATGCAAAAATATTTATATTTTGGCGGCGAGCGGCAAACGGGTGAGTAATATCTGGGGA  
TCTACCTAAATGAGGGGGATAACCATTTGAAACGGTGGCTAATACCGCATAATGTTGAAAA  
ACTAAAGCGGGGGATCTATTTTATATAGACCTTGCGCATTTAGATGAACCCAGACGAGATT  
GCTTGATGGTGAGGTAATGGCTTACCATGGCAACGATCTCTAGCTGGTCTGAGAGGATGAC  
CAGCCACACTGGAAGTGAAGACACGGTCCAGACTCCTACGGGAGGCAGCAGTGGGGAATAT  
TGCACAATGGGCGAAAGCCTGATGCAGCTATGCCGCGTGTATGAAGAAGGCCTTCGGGTTG  
TGAAGTACTTTCGTCAGGGAAGAAAAGGATAATGCTAACATCGTTATCAATTGACGTTACCT  
GAAAAAGAAGCACCGGCTAACTCCGTGCCAGCAGCCGCGGTAATACGGAGGGTGCAAGC  
GTTAATCAGAATTACTGGGCGTAAAGAGCTCGTAGGCGGTTATTTAAGTCAGATGTGAAATC  
CCTGGGCTTAACCTGGGAAGTGCATTTGAAACTGGATGACTAGAGTTTCGTAGAGGGAGGT  
AGAATTCTAGGTGTAGCGGTGAAATGCGTAGATATCTGGAGGAATACCTGTGGTGAAAGCG  
ACCTCCTGGACGAAAAGTGAAGCTGAGGTGCGAAAGCATGGGGAGCAAACAGGATTAGAT  
ACCCTGGTAGTCCATGCTGTAAACGATGTCGACTTGGAGGTTGTATCCATAGAGAAATGGC  
TTCCGAAGCTAACGCATTAAGTCGACCGCCTGGGGAGTACGGTCGCAAGGCTAAAGTCA  
AATGAATTGACGGGGGCCCCGCACAAGCGGTGGAGCATGTGGTTTAATTCGATGCAACGCG  
AAAAACCTTACCTGGTCTTGACATCCATAGAATTTTATAGAAATATAGAAGTGCCTTCGGGA  
ACTATGAGACAGGTGCTGCATGGCTGTCGTCAGCTCGTGTTGTGAAATGTTGGGTAAAGTC  
CCGCAACGAGCGCAACCCTTATCCTTTGTTGCCAGCGATAAAGTCGGGAACCTCAAAGGAG  
ACTGCCAGTGATAAACTGGAGGAAGGTGGGGATGACGTCAAGTCATCATGGCCCTTACGA  
GTAGGGCTACACACGTGCTACAATGGCGTATACAAAGAGAAGCGACCTCGCGAGAGCAAG  
CGGACCTCACAAAGTACGCCGTAGTCCGGATTGGAGTCTGCAACTCGACTCCATGAAGTC  
GGAATCGCTAGTAATCGTAGATCAGAATGCTGCGGTGAATACGTTCCCGGGCCTTGTACAC  
ACCGCCCGTACACCATGGGAGTGGGTGCGCAAAAGAAGTAGGTAGCTTAACCTTCGGGAG  
GGCGCTTACCACTTTGTGATTCATGACTGGGGTGAAGTCGTAACAAGGTA

>The chimeric sequence from aphid species *Lachnus siniquercus*

AGAGTTTGATCATGGCTCAGATTGAACGCTGGCGGCAGGCTTAACACATGCAAGTCGAGC  
GGTAGCACAAGAGAGCTTGCTCTCTGGGTGACGAGCGGCGGACGGGTGAGTAATGTCTGG  
GAAACTGCCTGATGGCGGGGGATAACTAGTGGAACAGTAGCTAATACCGCATAACGTGCG  
AAGACCAAAGTGGGGGACCTTCGGGCCTCACGCCATCAGATGTGCCAGGTGGGATTAGC

TGGTAGGTGGGGTAACGGCTCACCTAGGCGACGATCCCTAGCTGGTCTGAGAGGATGACC  
AGCCACACTGGAAGTGAACACGGTCCAGACTCCTACGGGAGGCAGCAGTGGGGAATATT  
GCGCAATGGGCGCAAGCCTGATGCAGCCATGCCGCGTGTGTGAAGAAGGCCTTCGGGTTG  
TAAAGCACTTTCAGCGAGGAGGAAGGGTAATGTGTTAATAAGACATTGCATTGACGTTACT  
CGCAGAAGAAGCACCGGCTAACTCCGTGCCAGCAGCCGCGGTAATACGGAGGGTGCAAGC  
GTTAATCGGAATTACTGGGCGTAAAGCGCACGCAGGCGGTTTGTAAAGTCAGATGTGAAAT  
CCCCGCGCTCAACGTGGGAACGGCATTGAGACTGGCAAGCTAGAGTCTTGTAGAGGGGG  
GTAGAATTCCAGGTGTAGCGGTGAAATGCGTAGAGATCTGGAGGAATACCAGTGGCGAAG  
GCGGCCCCCTGGACAAAGACTGACGCTCAGGTGCGAAAGCGTGGGGAGCAAACAGGATT  
AGATACCCTGGTAGTCCACGCTGTAAACGATGTCGATTTGGAGGTTGCGCCCTTGGGGGGT  
GGCTTCCGTAGCTAACGCGTTAAATCGACCACCTGGGGAGTACGGCCGCAAGGTTAAACT  
CAAATGAATTGACGGGGGCCCCGCACAAGCGGTGGAGCATGTGGTTTAATTCGATGCAACG  
CGAAGAACCTTACCTACTCTTGACATCCAGAGAACTTTCAGAGATGGAGGGGTGCCTTCG  
GGAGCTCTGAGACAGGTGCTGCATGGCTGACGTCAGCTCGTGTGTGAAATGTTGGGTAA  
GTCCCGCAACGAGCGCAACCCTTATCCTTTGTTGCCAGCGATAAAGTCGGGAACCTCAAAG  
GAGAACTGCCGGTGATAAACCGGAGGAAGGTGGGGATGACGTCAAGTCATCATGGCCCTT  
ACGACCAGGGCTACACACGTGCTACAATGGTACATACAAAGAGAAGCAACTCTGCAAAGA  
TAAGCCAACTCACAAAGTGTATCTAAGTTCGGACTGGAGTCTGCAACTCGACTCCACGA  
AGTCGGAATCGCTAGTAATCGTGGATCAGAATGCCACGGTGAATACGTTCCCGGGCCTTGT  
ACACACCGCCCGTCACACCATGGGAGTGGGTTGCAAAAGAAGCAGGTGTTCTAACCTTTA  
TGGAAGTAACCTACCCTTTGTGATTCATGACTGGGGTGAAGTCGTAACAAGGT

>The chimeric sequence from aphid species *Cinara pinikoraiensis*

GAACGCTGGCGGCAGGCCTAACACATGCAAGTCGAGCGGTAGCACAAAAGAGCTCGCTCT  
TTGGGTGACGAGCGGCGGACGGGTGAGTAATGTCTGGGAACTGCCTGATGGTGGGGGAT  
AACTAACGGAAACGGTAGCTAATACCGCATAATGTCGTAAGACCAAAGTGGGGGCCCTTCG  
GGCCTCACGCCATCAGATGTGCCAGATGGGATTAGCTAGTAGGTAGGGTAATGGCTTACCT  
AGGCTCCGATCCCTAGCTGGTCTGAGAGGATGACCAGCCACACTGGAAGTGAACACGGT  
CCAGACTCCCTACGGGAGGCAGCAGTGGGGAATATTGCACAATGGGCGCAAGCCTGATGC  
AGTCATGCCGCGTGTGTGAAGAAGGCCTTCGGGTTGTAAAGCACTTTCAGCGATGAGGAA  
ATGTAATGTCTTAATAAGGCATTGCATTGACGTTACTCGCAGAAGAAGCACCGGCTAACTCC  
GTGCCAGCAGCCGCGGTAATACGGAGGGTGCAAGCGTTAATCGGAATTACTGGGCGTAAA  
GAGCACGTAGGCGGTTATTTAAGTCAGATGTGAAATCCCTGGGCTTAACCTAGGAACTGCA  
TTTGAAACTGGATAACTAGATTTTCGTAGAGGGAGGTAGAATTCTAGGTGTAGCGGTGAAA  
TGCGTAGATATCTGGAGGAATACCTGTGGCGAAAGCGACCTCCTGGACGAAAACCTGACGC  
TGAGGTGCGAAGGCATGGGGAGCAAACAGGATTAGATACCCTGGTGGTCCATGCTGTAAA  
CGATGTCGACTTGGAGGTTGTATCCATAGAGAAATGGCTTCCGAAGCTAACGCATTAAGTC  
GACCGCCTGGGGAGTACGGTCGCAAGGCTAAAACCCAAATGAATTGACGGGGGCCCCGCAC  
AAGCGGTGGAGCATGTGGTTTAATTCGATGCAACGCGAAAAACCTTACCTGGTCTTGACAT  
CCATGGAACCTATAGAAATATAGAGGTGCCTTCGGGAACTATGAGACAGGTGCTGCATGG  
CTGTCGTCAGCTCGTGTGTGAAATGTTGGGTAAAGTCCCGCAACGAGCGCAACCCTTATC  
TTTTGTTACCAGCGGTTTCGGCCGGGGACTCAAGGGAGACTGCCGGTTATAAACCGGAGGA  
AGGTGGGGACGACGTCAAGTCATCATGGCCCTTACGACCAGGGCTACACACGTGCTACAAT

GGTGCATACAAAGAGATGCAACTCTGCAAAGATAAGCAAACCTCATAAAGTGTATCGTAGT  
CCGGACTGGAGTCTGCAACTCGACTCCACGAAGTCGGAATCGCTAGTAATCGTGGATCAG  
AATGCCACGGTGAATACGTTCCCGGGCCTTGTACACACCGCCCGTCACACCATGGGAGTGA  
GTTGCAAAAGAAGCAGGTTATCTAACCAATTTACTTTGGAGGACGCCTACCACTTTGTGGT  
TCATAACTGGGGTGAAGTCGTAACAA

>The chimeric sequence from aphid species *Cinara formosana* (location-Fujian)

AGAGTTTGATCATGGCTCAGATTGAACGCTGGCGGCAAGCCTAACACATGCAAGTCGTGCG  
GCATCGAAAAAATATTTATATTTTGTTCGGCAAGCGGCGAACGGGTGAGTAATATCTGGGGA  
TCTACCTAAGTGAGAGGGACAACACTACTGGAAACGGTGGCTAATACCGCATAATGTTGAAAA  
ACCAAAGCAGGGGATCTGAAGTAGAAAGACCTTGCGCTCTTAGATGAACCCAGACGAGAT  
TAGCTAGATGGTAAGGTAAAGGCTTACCATGGCTACGATCTCTAGCTGGTCTGAGAGGATG  
GCCAGCCACACTGGAAGTGAAGACGCGGTCCAGACTCCTACGGGAGGCAGCAGTGGGGAA  
TATTGCACAATGGGCGAAAGCCTGATGCAGCTATGCCGCGTGTATGAAGAAGGCCTTCGGG  
TTGTAAAGCACTTTCAGCGAGGAAGAAGGGTAATGCCTTAATAAGGCATTACATTGACGTT  
ACTCGCAGAAGAAGCACCGGCTAACTCCGTGCCAGCAGCCGCGTAATACGGAGGGTGCG  
AGCGTTAATCGGAATTACTGGGCGTAAAGCGCATGCAGGCGGTCCGTTAAGTCAGATGTGA  
AATCCCCGCGCTTAACGTGGGAACTGCATTTGAAACTGGCAGGCTAGAGTCTTGTAGAGGG  
GGGTAGAATTCAGGTGTAGCGGTGAAATGCGTAGAAATCTGGAGGAATACCGGTGGCGA  
AGGCGGCCCCCTGGACAAAGACTGACGCTCAGGTGCGAAAGCGTGGGGAGCAAACAGGA  
TTAGATACCCTGGTAGTCCACGCTGTAAACGATGTGCGATTTGGAGGTTGTATCCTTGAGATG  
TGGCTTCCGAAGCTAACGCGTTAAATCGACCGCTGGGGAGTACGACCGCAAGGTTAAAA  
CTCAAATGAATTGACGGGGGCCCCGCACAAGCGGTGGAGCATGTGGTTTAATTGATGCAAC  
GCGAAGAACCTTACCTGGTCTTGACATCCATAGAATTTTGTAGAAATATAAAAGTGCCTTCG  
GGAGCTATGAGACAGGTGCTGCATGGCTGTCGTCAGCTCGTGTGTGAAATGTTGGGTAA  
GTCCCGCAACGAGCGCAACCCTTATCTTTTGTACCATCGGTTTCGGCCGGGGACTCAAGGG  
AGACTGCCGGTTATAAACCGGAGGAAGGTGGGGACGACGTCAAGTCATCATGGCCCTTAC  
GGCCAGGGCTACACACGTGCTACAATGGTACATACAAAGAGAAGCAATTCTGCGAAGATA  
AGCAAACCTCATAAAGTGTATCGTAGTCCGGACTGGAGTCTGCAACTCGACTCCACGAAGT  
CGGAATCGCTAGTAATCGTGGATCAGAATGTCACGGTGAATACGTTCCCGGGCCTTGTACA  
CACCGCCCGTCACACCATGGGAGTGAGTTGCAAAAGAAGCAGGTTATCTAACCTTAATTTA  
AGGAGGATGCCTACCACTTTGTGGTTCATAACTGGGGTGAAGTCGTAACAAGGTA

>The chimeric sequence from aphid species *Cinara formosana* (location-Yunnan)

AGAGTTTGATCATGGCTCAGATTGAACGCTGGCGGCAAGCCTAACACATGCAAGTCGTGCG  
GCATCGAAAAAATATTTATATTTTGTTCGGCAAGCGGCGAACGGGTGAGTAATATCTGGGGA  
TCTACCTAAGTGAGAGGGACAACACTACTGGAAACGGTGGCTAATACCGCATAATGTTGAAAA  
ACCAAAGCAGGGGATCTGTAGTATCAAGACCTTGCGCTCTTAGATGAACCCAGATGAGATT  
AGCTTGATGGTAAGGTAAAGGCTTACCATGGCGACGATCTCTAGCTGGTCTGAGAGGATGG  
CCAGCCACACTGGAAGTGAAGACACGGTCCAGACTCCTACGGGAGGCAGCAGTGGGGGAATA  
TTGCACAATGGGCGAAAGCCTGATGCAGCTATGCCGCGTGTATGAAGAAGGCCTTAGGGTT  
GTAAAGTACTTTCGTCAGGAAAGAAGCTAACAAAGCTAATATCTTTGTTAATTGACGTTACC  
TGAAAAAGAAGCACCGGCTAACTCCGTGCCAGCAGCCGCGTAATACGGAGGGTGCTAGC

GTAAATCAGAATTACTGGGCGTAAAGAGCACGTAGGCGGTTTTTTAAGTCAGATGTGAAAT  
CCCTGGGCTTAACCTAGGAACTGCATTTGAAACTAAATTACTAGAGTTTCGTAGAGGGAGG  
TAGAATTCTAGGTGTAGCGGTGAAATGCGTAGATATCTGGAGGAATACCAGTGGCGAAAGC  
GACCTCCTGGACGAAAACCTGACGCTGAGGTGCGAAAGCGTGGGGAGCAAACAGGATTAG  
ATACCCTGGTAGTCCATGCTGTAAACGATGTCGACTTGGAGGTTGCTTCCTTAGAGGAATG  
GCTTCCGAAGCTAACGCATTAAGTCGACCGCCTGGGGAGTACGGTCGCAAGGCTAAAACCT  
CAAATGAATTGACGGGGGGCCCGCACAAAGCGGTGGAGCATGTGGTTTAATTCGATGCAACG  
CGAAGAACCTTACCTACTCTTGACATCCAGCGAATCCTTTAGAGATAGAGGAGTGCCTTCG  
GGAACGCTGAGACAGGTGCTGCGATGGCTGTCGTCAGCTCGTGTGTGAAATGTTGGGTAA  
GTCCCGCAACGAGCGCAACCCTTATCCTTTGTTGCCAGCGATTTCGGTCGGGAACTCAAAGG  
AGACTGCCGGTGATAAACCGGAGGAAGGTGGGGATGACGTCAAGTCATCATGGCCCTTAC  
GAGTAGGGCTACATACGTGCTACAATGGCGTATACAGAGAGAGGGCGAGCCAGCGATGGGA  
AGCGGAACTCAGAAAGTACGTGCGAAGTCCGGATTGGAGTCTGCAACTCGACTCCATGAAG  
TCGGAATCGCTAGTAATCGCGGATCAGCATGTGCGGGTGAATACGTTCCCGGGCCTTGTAC  
ACACCGCCCGTCACACCATGGGAGTGGGTTGCAAAAGAAGTAGGTAGCTTAACCTTTTGG  
ATGGCGCTTACCACTTTGTGATTAATGACTGGGGTGAAGTCGTAACAAGGTA

>The chimeric sequence type I from aphid species *Stomaphis sinisalicis*

AGAGTTTGATCATGGCTCAGATTGAACGCTGGCGGCAAGCCTAACACATGCAAGTCGTGCG  
GCATCGTAAAAAGATAGTAAAATATTTTTTGGCGGCGAGCGGCAAACGGGTGAGTAATATC  
TGGGGATCTACCTAGATGAGGGGGATAACTATTGGAACGATAGCTAATACCGCATAATGTT  
TAATAACCAAAGTAGGGGATCTTGGAAGAGACCTTGCGCATTTAGATGAACCCAGACGAGA  
TTAGTTTGATGGTAAGGTAAAAGCTTACCAAGACTACAATCTCTAGCTGGTCTTAGAGGATG  
GCCAGCCACACTGGAAGTGAAGACACGGTCCAGACTCCTACGGGAGGCAGCAGTGGGGAA  
TATTGCACAATGGGCGAAAGCCTGATGCAGCTATGCCGCGTGTATGAAGAAGGCCTTAGGG  
TTGTAAAGTACTTTCAGCAGGGAGGAAGGTATTAAATATAATACATTTAATAATTGACGTTAC  
CTGAAGAAGAAGCACCGGCTAACTCCGTGCCAGCAGCCGCGGTAATACGGAGGGTGCAAG  
CGTTAATCGGAATTACTGGGCGTAAAGAGCTCGTAGGCGGTTTTTTAAGTCAGATGTGAAA  
TCCCAGGGCTTAACCTTGGAAGTGCATTTGAAACTAGAAGACTAGAGTTTCGTAGAGGGA  
GGTAGAATTCTAGGTGTAGCGGTGAAATGCGTAGATATCTGGAGGAATACCAGTGGCGAAA  
GCGGCCTCCTGGACGAAAACCTGACGCTGAGGTGCGAAAGCGTGGGGAGCAAACAGGATT  
AGATACCCTGGTAGTCCATGCTGTAAACGATGTCGACTTGGAGGTTGTTTCCTAAGAGGAA  
TGACTTCCGAAGCTAACGCATTAAGTCGACCGCCTGGGGAGTACGGTCGCAAGGCTAAAA  
CTCAAATGAATTGACGGGGGGCCCGCACAAAGCGGTGGAGCATGTGGTTTAATTCGATGCAAC  
GCGAAGAACCTTACCTACTCTTGACATCCAGAGAACTTTCCAGAGATGGAGAGGTGCCTTT  
AGGAGCTCTGAGACAGGTGCTGTATGACTGTGTCGTCAGCTCGTGTGTGAAATGTTGGGTAA  
AGTCCCGCAACGAGCGCAACCCTTATCCTTTGTTGCCAGCGATAAAGTCGGGAACTCAAA  
GGAGACTGCCGGTGATAAACCGGAGGAAGATGGGGATGACGTCAAGTCATCGTGGCCCTT  
ACGAGTAGGGCTACACACGTGCTACAATGGCGTATACAAAGAGAAGCGACCTCGCGAGAG  
CAAGCGGACCTCATAAAGTATGTCGTAGTCCGGATTGGAGTCTGCAACTCGACTCCATGAA  
GTCGGAATCGCTAGTAATCGTAGATCAGAATGCTACGGTGAATACGTTCCCGGGCCTTGTAC  
ACACCGCCCGTCACACCATGGGAGTGGATTGCAAAAGAAGTAGGTAGCTTAACCTTCGGG  
AGGGCGTTTACCACTTTGTGATTCATGACTGGGGTGAAGTCGTAACAAGGTA

>The chimeric sequence II from aphid species *Stomaphis sinisalicis*

ACCTTGTTACGACTTCACCCCAGTCATGAATCACAAAGTGATAGATTCCCTCTGTTTAAAC  
AGTTAAGATATCTGCTTCTTTTGCAACCCACTCCCATGGTGTGACGGGCGGCGTGTACAAG  
GCCCCGGAACGTATTCACCGTGGCATTCTGATCCACGATTACTAGCGATTCCGACTTCGTGG  
AGTCGAGTTGCAGACTCCAGTCCGGACTACGATATACTTTATGAGGTTTGCTTATCTTTACG  
GAGTCGCTTCTCTTTGTATATAACCATTGTAGCACGTGTGTAGCCCTGGTCGTAAGGGCCATG  
ATGACTTGACGTCGTCCCCACCTTCCTCCGGTTTATAACCGGCAGTCTCCCCTGAGTTCCCG  
GCCGAACCGATGGCAACAAAGGATAGGGGTTGCGCTCGTTGCGGGACTTAACCCAACATT  
TCACAACACGAGCTGACGACAGCCATGCAGCACCTGTCTCATAGTTCCCGAAGGCACTTCT  
ATATTTCTATAAAATTCTATGGATGTCAAGACCAGGTAAGGTTCTTCGCGTTGCGTCGAATTA  
AACCACATGCTCCACCGCTTGTGCGGGTCCCCGTCAATTCTTTGAGTTTAACTTTGCGAC  
CGTAGTCCCCAGGCGGAATGTTTAAACGCGTTAGCTGTAATACAGAAAGTAAACTTCCCAT  
ATTTAACATTCATCGTTTACAGCGTGGACTACCAGGGTATCTAATCCTGTTTGCTCCCCACGC  
CTTCGCGCCTCAGCGTCAGATTTGAACCAGATAGACGCCTTCGCCACTGGTGTTCCCTCCTA  
ATATTACGAATTCACCTCTACACTAGGAATTCCTCTATCCTCTTTCAATCTCTAGATTAGCA  
GTTTTTAAAAGCAATTCCAAGGTTGAGCCTTGGGATTTCACTTTTAACTTACTAATCCGCCTA  
CGCGCCCTTTACGCCCAATAATTCCGAATAACGCTAGCCCTCTCCGTATTACCGCGGCTGCT  
GGCACGGAGTTAGCCAGGACTTCTTCTGTGAGTACCGTCATTATCTTCCTCACTAAAAGAG  
CTTTACAACCCAAAGGCCTTCTTCACTCATGCGGCATGGCTGGATCAGGCTTTCGCCCATTG  
TCCAATATTCCCCCTGCTGCCTCCCGTAGGAGTCTGGACCGTATCTCAGTTCCAGTGTGGC  
TGATCATCCTCTCAGATCAGCTATAGATCATTGCCTTGGTAGGCTATTACTCCACCAACTAGC  
TAATCTAATATAGGCTCATCTAATAGCAATAAATTTTTCCCCCGTAGGGCGTATACGGTATTAG  
TTGCCGTTTCCAACAATTATTCGCACTATTAGGTAGATTCTTATACATTACCCACCCGTCTG  
CCACTAAGTTATACCATAGCAAGCTACAATATAACTCCGTTGCACTTGCATGTGTTAGGCCT  
GCCGCCAGCGTTCAATCTGAGCCATGATCAAACCTCT

>The chimeric sequence III from aphid species *Stomaphis sinisalicis*

AGAGTTTGATCATGGCTCAGATTGAACGCTGGCGGCAAGCCTGACACATGCAAGTCGTGC  
GGCATCGTAAAAAGATAGTAAAATATTTTTTTGGCGGCGAGCGGCAAACGGGTGAGTAATAT  
CTGGGGATCTACCTAGATGAGGGGGATAACTATTGGAAACGATAGCTAATACCGCATAATGT  
TTAATAACCAAAGTAGGGGATCTTGAAAAAGGCCTTGCGCATTTAGATGAACCCAGACGAG  
ATTAGTTTGATGGTAAGGTAAAAGCTTACCAAGACTACAATCTCTAGCTGGTCTTAGAGGAT  
GGCCAGCCACACTGGAAGTGAAGACACGGTCCAGACTCCTACGGGAGGCAGCAGTGGGGA  
ATATTGCACAATGGGCGAAAGCCTGATGCAGCTATGCCGCGTGTATGAAGAAGGCCTTAGG  
GTTGTAAAGTACTTTTACGACAGGGAGGAAGGTATTAATATAATACATTTAATAATTGACGTTA  
CCTGAAGAAGAAGCACCGGCTAACTCCGTGCCAGCAGCCGCGGTAATACGGAGGGTGCAA  
GCGTTAATCGGAATTACCGGGCGTAAAGAGCTCGTAGGCGGTTTTTTAAGTCAGATGTGAA  
ATCCCAGGGCTTAACCTTGGAAGTGCATTTGAAACTAGAAGACTAGAGTTTCGTAGAGGGA  
GGTAGAATTCTAGGTGTAGCGGTGAAATGCGTAGATATCTGGAGGAATACCAGTGGCGAAA  
GCGGCCTCCTGGACGAAAAGTACGCTGAGGTGCGAAAGCGTGGGGAGCAAACAGGATT  
AGATACCCTGGTAGTCCATGCTGTAAACGATGTCGACTTGGTGGTTGTGCCCTTGAGGGTG  
GCTTCCGTAGCTAACGCGTTAAATCGACCGCCTGGGGAGTACGGCCGCAAGGTTAAAACTC

AAATGAATTGACGGGGGCCCCGCACAAGCGGTGGAGCATGTGGTTTAATTCGATGCAACGC  
GAAGAACCTTACCTACTCTTGACATCCAGAGAACTTTCCAGAGATGGAGAGGTGCCTTTAG  
GAGCTCTGAGACAGGTGCTGCATGGCTGTCGTCAGCTCGTGTGTGAAATGTTGGGTAAAG  
TCCCGCAACGAGCGCAACCCTTATCCTTTGTTGCCAGCGATAAAGTCGGGAACCTCAAAGG  
AGACTGCCGGTGATAAACCGGAGGAAGATGGGGATGACGTCAAGTCATCATGGCCCTTAC  
GAGTAGGGCTACACACGTGCTACAATGGCGTATACAAAGAGAAGCGACCTCGCGAGAGCA  
AGCGGACCTCATAAAGTATGTCGTAGTCCGGATTGGAGTCTGCAACTCGACTCCATGAAGT  
CGGAATCGCTAGTAATCGTAGATCAGAATGCTACGGTGAATACGTTCCCGGGCCTTGTACAC  
ACCGCCCGTCACACCATGGGAGTGGATTGCAAAAGAAGTAGGTAGCTTAACCTTCGGGAG  
GGCGTTTACCACTTTGTGATTCATGACTGGGGTGAAGTCGTAACAAGGTA

>The chimeric sequence from aphid species *Stomaphis betulidauricae*

ACGATTAGAGTTTGATCATGGCTCAGATTGAACGCTGGCGGCAAGCCTAACACATGCAAGT  
CGTGCGGCATCGTAAAAAATAGTAAAATATTTTTTGGCGGCGAGCGGCAAACGGGTGAGT  
AATATCTGGGGATCTGCCTAGATGAGGGGGATAACTATTGGAAACGATAGCTAATACCGCAT  
AATGTTTAATAACCAAAGTAGGGGATCTTGTAAGACCTTGCGCATTTAGATGAACCCAG  
ACGAGATTAGTTTGATGGTAAGGTAAAAGCTTACCAAGACCGCAATCTCTAGCTGGTCTGA  
GAGGATGGCCAGCCACACTGGAAGTGAAGACACGGTCCAGACTCCTACGGGAGGCAGGCA  
GTGGGGAATATTGCACAATGGGCGAAAGCCTGATGCAGCTATGCCGCGTGTATGAAGAAGG  
CCTTAGGGTTGTAAAGTACTTTCAGCAGGGAAGAAGGTATTAAATATAATACATTTAATAATT  
GACGTTACCTGAAGAAGAAGCACCGGCTAACTCCGTGCCAGCAGCCGCGGTAATACGGAG  
GGTGCAAGCGTTAATCGGAATTACTGGGCGTAAAGGGCACGCAGGTGGTTAATTAAGTTGG  
ATGTGAAATCCCCGGGCTCAACCTGGGAATGGCATTCAAACTGGTTAGCTAGAGTCTTGT  
AGAGGGGGGTAGAATTCCATGTGTAGCGGTGAAATGCGTAGAGATGTGGAGGAATACCAG  
TGACGAAGGCGACCCCCTGGACAGAGACTGACGCTCATGTGCGAAAGCGTGGGGAGCAA  
ACAGGATTAGATACCCTGGTAGTCCACGCTGTAAACAATGTCGATTTGGAGGTTGTAGTCTT  
GAACTGTGGCCTCCGGAGCTAACGCGTTAAATCGACCGCCTGGGGAGTACGGCCGCAAGG  
TTAAAACTCAAATGAATTGACGGGGGCCCCGCACAAGCGGTGGAGCATGTGGTTTAATTCGA  
TGCAACGCGAAGAACCTTACCTACTCTTGACATCCAAAGAAGCCTTTAGAGGTAGAGGCG  
TGCCTTAGGGAGCTTTGAGACAGGTGCTGCATGGCTGTCGTCAGCTCGTGTGTGAAATGT  
TGGGTAAAGTCCCGCAACGAGCGCAACCCTTATCCCTTGTGTCAGCGATTCCGGTCGGGAA  
CTCAAGGGAGACTGCCGGTGATAAACTGGAGGAAGGTGGGGATGACGTCAAGTCATTATG  
GCCCTTACGAGTAGGGCTACACACGTGCTACAATGGCGTATACAGAGAGAGGCTATCCTGC  
GAAGGGAAGCGGAACCTCATAAAGTACGTCACAGTCCGGATTGGAGTCTGCGACTCGACTC  
CATGAAGTCGGAATCGCTAGTAATCGCGGATCAGAATGTCGCGGTGAATACGTTCCCGGGC  
CTTGTACACACCGCCCGTCACACCATGGGAGTGGGTGCAAAAGAAGGAGGTAGCTTAAC  
CTTTTAGGATGGCGCTTACCACTTTGTGATTCATGACTGGGGTGAAGTCGTAACAAGGTA

>The chimeric sequence from aphid species *Nippolachnus piri*

AGAGTTTGATCATGGCTCAGATTGAACGCTGGCGGCAAGCCTAACACATGCAAGTCGTGCG  
GCATCGTGAAATTTTTTTTTTAAATTTTGACGGCGAGCGGCGAACGGGTGAGTAATATCTG  
GGGATCTACCTAAATGAGGGGGATAACCATTGGAAACGGTGGCTAATACCGCATAAAGTTT  
TAGAACCAAAGTGGGGGACTTTTAAAGCCTCACGCATTTAGATGAACCCAGATGAGATT

AGCTAGATGGTAAGATAATAGCTTACCATGGCGACGATCTCTAGCTGGTCTGAGAGGATGG  
CCAGCCACACTGGAAGTGAAGATACGGTCCAGACTCTTACGGGAGGCAGCAGTGGGgAATAT  
TGCACAATGGGCGAAAGCcTGATGCAGCTATGCcGCGTGTATGAaGAAGgCcTtCGGGTtGTaA  
AGTACTTTTCAGTAGGgAAGAAAtTATTTAGATTAATACTTTAAATAATTGACGTTACTtACaAA  
AGAAGCACCCGGCTAACTCCGTGCCAGCAGCCGCGGTAATACGGAGGGTGCAGAGCGTTAAT  
CAGAATTACTGGGCGTAAAGAGCTCGTAGGCGGTATTTTAAAGTCAGATGTGAAATCCCTGG  
GCTTAACCTAGGAACTGCATTTGAAACTGAAATACTAGAGTTTCGTAGAGGGAGGTAGAAT  
TCTAGGTGTAGCGGTGAAATGCGTAGATATCTGGAGGAATACCAGTGGCGAAAGCGGCCCC  
CTGGACGAAGACTGACGCTCAGGTACGAAAGCGTGGGGAGCAAACAGGATTAGATACCCC  
GGTAGTCCACGCCGTAAACGATGTTCGATTTGAAGGTTGCAGCCTTGAGCTGTGGCTTTTCGG  
AGCTAACGCGTTAAATCGACCCGCTGGGGAGTACGGCCGCAAGGTTAAAACTCAAATGAA  
TTGACGGGGGGCCCGCACAAAGCGGTGGAGCATGTGGTTTAAATTCGATGCAACGCGAAAAAC  
CTTACCTACTCTTGACATCCAGAGAATTTAGCAGAGATGCTTTAGTGCCTTCGGGAACCTCTG  
AGACAGGTGCTGCATGgCTGTCTCAGCTCGTGTTGTGAAATGTtGGGTtGAGTCCCGCAaC  
GAGCGCAaCCCTCATccTTTGTtGCcAGCGATtCGgTCGGGaACTCAAAGGAGACTGCCGGTGA  
TAAACCGGAGGAAGGCGGGGACGAGGTCAAGTCATCATGGCCCTTACGAGTAGGGCTACA  
CACGTGCTACAATGGCGTATACAAAGAGAAGCAAACCTTGCGAGAGTTAGCGGACCTCACA  
AAGTACGTCAAAGTCCGGATTGGAGTCTGCAACTCGACTCCATGAAGTCGGAATCGCTAGT  
AATCGCGGATCAGAATGCCGCGGTGAATACGTTCCCGGGCCTTGTACACACCGCCCGTCAC  
ACCATGGGAGCGGGTTGCAAAAGAAGCAGGTAACCTAACCTTAGGGAGGGCGCCTACCAC  
TTTGTGATTCATGACTGGGGTGAAGTCGTAACAAGGTA

>The chimeric sequence from aphid species *Lachnus quercihabitan*s

AGAGTTTGATCATGGCTCAGATTGAACGCTGGCGGCAAGCCTAACACATGCAAGTCGTGCG  
GCATCGTGAAAACCTTAACAGTTTTTTGACGGCGAGCGGCAAACGGGTGAGTAATATCTGGG  
GATCTGCCTAAATGAGGGGGGTAACCTATTGGAAACGATAGCTAATACCGCATAATGTTTAAAC  
AACCAAAGTGGGGGACTGTGAAAGGCCTCATGCATTTAGATGAACCCAGACGAGATTAGT  
TTGATGGTTAGGTAAAGGCTGACCATGACTACAATCTCTAGCTGGTCTGAGAGGATAACCA  
GCCACACTGGAAGTGAAGACACGGTCCAGACTCTTACGGGAGGCAGCAGTGGGGAATATTG  
CACAATGGGCGAAAGCCTGATGCAGCTATGCCGCGTGTATGAAGAAGGCCTTCGGGTTGTA  
AAGTACTTTTCAGTAAGGAGGAAGTAATTAATACTATTAATTATTGACGTTACTTACA  
AAAGAAGCACCCGGCTAACTCCGTGCCAGCAGCCGCGGTAATACGGAGGGTGCTAGCGTTA  
ATCGGAATTACTGGGCGTAAAGAGCTCGTAGGCGGTTTTATAAGTCAGATGTGAAATCCCT  
GGGCTTAACCTAGGAACTGCATTTGAAACTATAATACTTGAGTTTCGTAGAGGGAGGTAGA  
ATTCTAGGTGTAGCGGTGAAATGCGTAGATATCTGGAGGAATACCAGTGGCGAAAGCGGCC  
TCCTGGACGAAGACTGACGCTGAGGTGCGAAAGCGTGGGGAGCAAACAGGATTAGATACC  
CTGGTAGTCCACGCTGTAAACGATGTCAACTTGGAGGTTGTTTTCTTAGAAAAGTGACTTC  
CGAAGCTAACGCATTAAGTTGACCGCCTGGGGAGTACGGTCGCAAGGCTAAAACTCAAAT  
GAATTGACGGGGGGCCCGCACAAAGCGGTGGAGCATGTGGTTTAAATTCGATGCAACGCGAAG  
AACCTTACCTGGTCTTGACATCCATAGAATTTTATAGAAATATAGAAGTGCCTTCGGGAATTA  
TGAGACAGGTGCTGCATGGCTGTCGTCAGCTCGTGTTGTGAAATGTTGGGTAAAGTCCCGC  
AACGAGCGCAACCCTTGTCTTTGTTGCCAACGGTTCGGCCGGGAACCTCAAAGGAAACTG  
CCGGTTATAAACCGGAGGAAGGTGGGGACGACGTCAAGTCATCATGGCCCTTACGACCAG



GGCTACACACGTGTTACAATGGCGTATACAAAGAGAAGCAACCTTGCAAAAGTAAGCGAA  
TCTCATAAAGTATGTCGTAGTTTCGGATTGGAGTCTGCAACTCGACTCCATGAAGTCGGAATC  
GCTAGTAATCGTAGATCAGAATGCTACGGTGAATACGTTCCCGGGCCTTGTACACACCGCCC  
GTCACACCATGGGAGTGGGTTGCAAAAGAAGTGGGTAGCTTAACCTTTTTGGAGAGCGCT  
TACCACTTTGTGATTCATAACTGGGGTGAAGTCGTAACAAGGTA

>The chimeric sequence from aphid species *Stomaphis quercisucta*

ATTGAACGCTGGCGGCAAGCCTAACACATGCAAGTCGTGCGGCAGCATAAAAAATAGTAA  
AATATTTTTGTCGGCGAGCGGGCAACGGGTGAGTAATATCTGGGGATCTACCTAAATGAGG  
GGAATAACTATTGGAAACGATAGCTAATACCGCATAATGTTTAATAACCAAAGTAGGGGATC  
TTTTTTTAAAGACCTTGCGCGTTTAGATGAACCCAGACGAGATTAGCTTGTGGTAAGGTAA  
TGGCTTACCAATGCTACAATCTCTAGCTGGTCTGAGAGGATGGCCAGCCACACTGGAAGTGA  
AGACACGGTCCAGACTCCTACGGGAGGCAGCAGTGGGGAATATTGCACAATGGGCGAAAG  
CCTGATGCAGCTATGCCGCGTGTATGAAGAAGGCCTTAGGGTTGTAAAGTACTTTCAGCAG  
GGAGGAAGGTATTAAGTTTAATACATTTAATAATTGACGTTACCTGAAGAAGAAGCACCGG  
CTAACTCCGTGCCAGCAGCCGCGGTAATACGGAGGGTGCGAGCGTTAATCGGAATTACTGG  
GCGTAAAGGGCACGTAGGCGGTTTTTTAAGTCAGATGTGAAATCCCCGAGCTTCACTTGGG  
AACGGCATTGAAACTGAGGGGCTAGAGTTTTGTAGAGGGGGGTAGAATTCCAGGAGTAG  
CGGTGAAATGCATAGATATCTGGAGGAATACCGGTGGCGAAGGCGGCCCCCTGGACAGGG  
ACTGACGCTGAGGTGCGAAAGCGTGGGTAGCAAACAGGATTAGATACCCTGGTAGTCCAC  
GCTGTAAACGATGTCGATTTGTAGGTTGTGGTAAAGAACTGTGGCTTGCGAAGCAAACGCG  
TTAAATCGACCGCCTGGGGAGTACGGCCGCAAGGTAAAACTCAAATGAATTGACGGGGG  
CCCGCACAAGCGGTGGAGCATGTGGTTTAGTTTCGATGCAACGCGAAGAACCTTACCTACTC  
TTGACATCCAGAGGAGTTAACAGAGATGTTGATGTGCCCTTCGGGGAGCTTCGAGACAGG  
TGCTGCATGGCTGTCGTCAGCTCGTGTGTGAAATGTTGGGTAAAGTCCCGCAACGAGCGC  
AACCCTTATCTTTTGTGGCCAGCACGTAGAGGTGGGAACTCAAGAGAGACTGCCGGTGATA  
AACTGGAGGAAGGTGGGGATGACGTCAAGTCATCATGGCCCTTACGAGTAGGGCTACACA  
CGTGCTACAATGGCGTATACAAAGAGAAGCGCGCCTGCGAGGGTAAGCGGACCTCATAAA  
GTACGTCGTAGTCCGGATTGGAGTCTGCAACTCGACTCCATGAAGTCGGAATCGCTAGTAA  
TCGTGGATCAGAATGCTACGGTGAATACGTTCCCGGGCCTTGTACACACCGCCCGTCACAC  
CATGGGAGTGGCTTGCAAAAGAAGTGAGTAGTTTAACTTTCGGAAGGAAGAGGGCGCTTA  
CCTTTTGTGATTCATGACTGGGGTGAAGTCGTAA
